# Supplementary material for: HBT-based turn-on fluorescent probe for discrimination of homocysteine from glutathione/cysteine and its bioimaging applications
Source: Royal Society of Chemistry journal article supplement (doi:10.1039/c6ra28712c), 2017-01-01
Supplement: c6ra28712c1.pdf [file c6ra28712c1.pdf]

## Electronic Supplementary Information

### **HBT-based turn-on fluorescent probe for discrimination of Homocysteine from Glutathione/Cysteine and its bioimaging applications**

Fengzao Chen <sup>a,b</sup>, Yuanchao Sun <sup>a</sup>, Zhen Chen <sup>a</sup>, Heng Liu <sup>a,\*</sup>, Deman Han <sup>b</sup>,

Hanping He <sup>a</sup>, Xiuhua Zhang <sup>a</sup>, Shengfu Wang <sup>a</sup>

<sup>a</sup> Hubei Collaborative Innovation Center for Advanced Organic Chemical Materials, Ministry of Education Key Laboratory for the Synthesis and Application of Organic Functional Molecules & College of Chemistry and Chemical Engineering, Hubei University, Wuhan 430062, PR China.

<sup>b</sup> Department of Chemistry, Taizhou University, Jiaojiang 318000, PR China.

\*Corresponding author: H. Liu, E-mail: [liuheng11b@hubu.edu.cn](mailto:liuheng11b@hubu.edu.cn).

# 1. Structure characterizations for HBT-Ac and HBTI

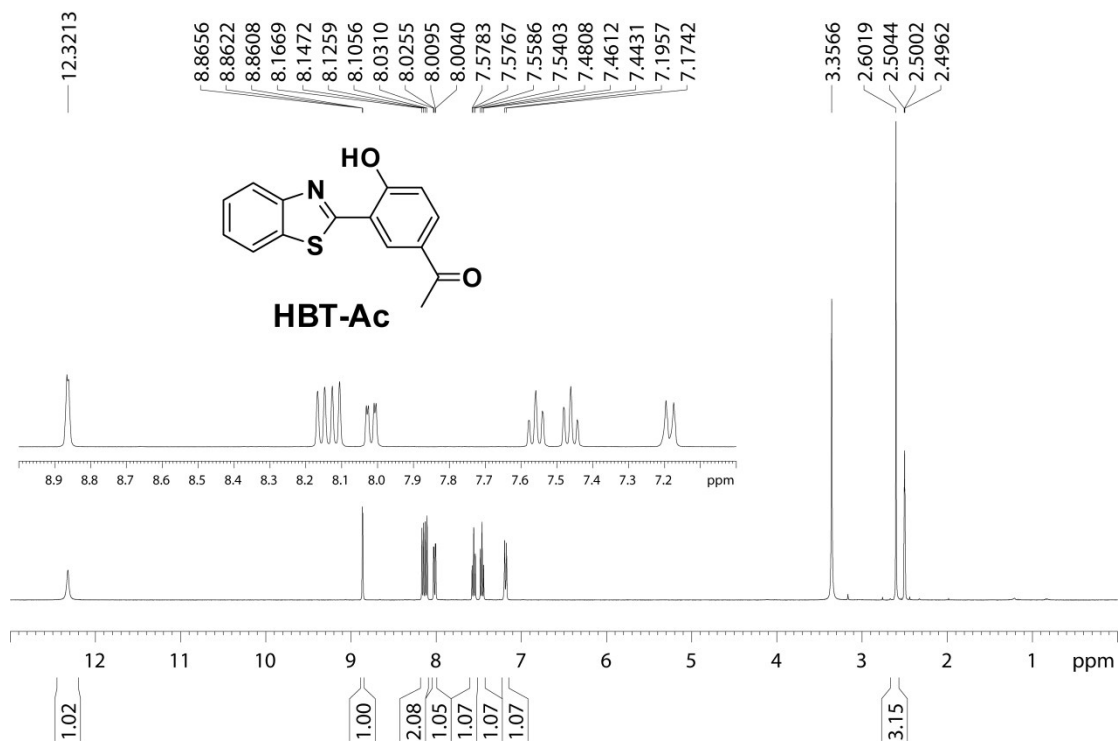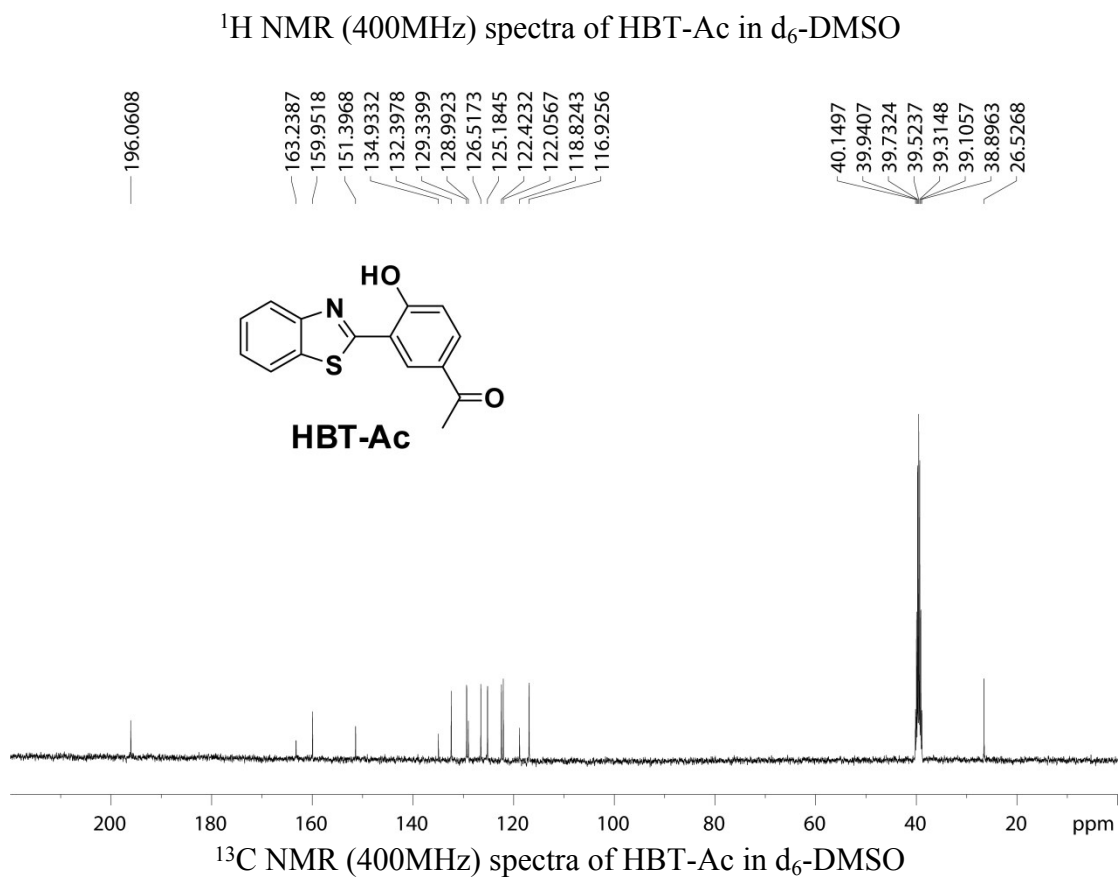

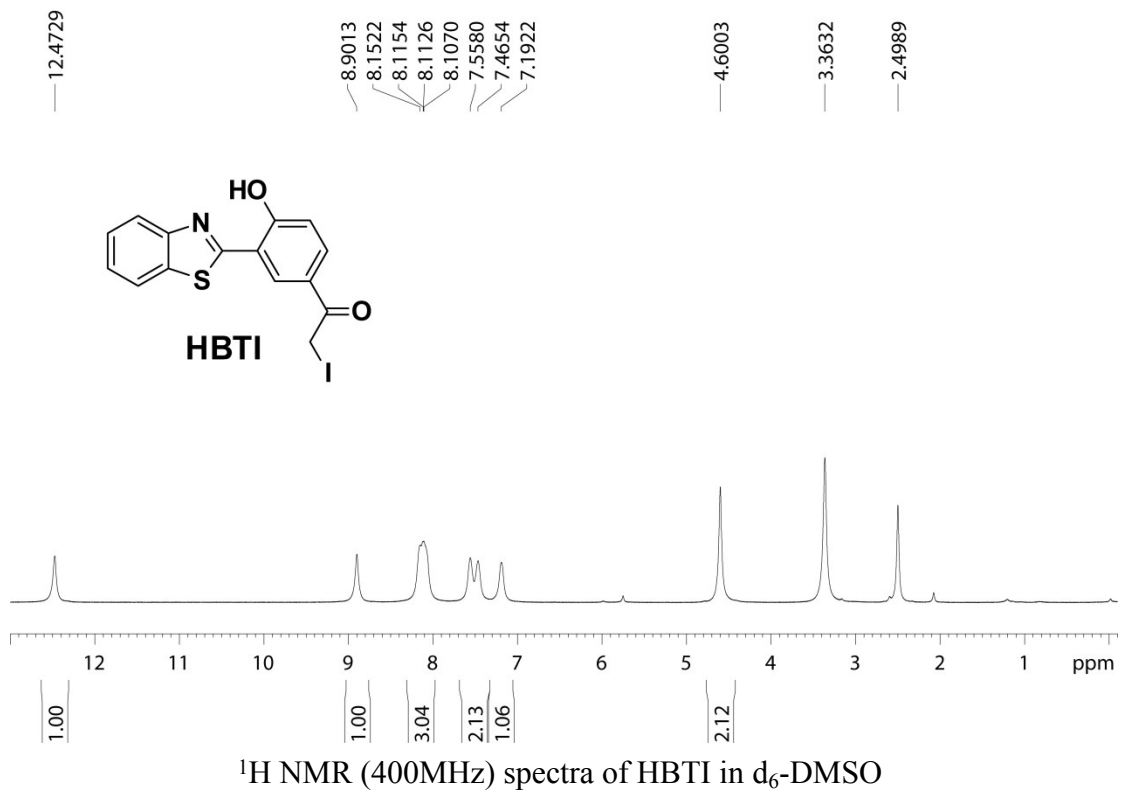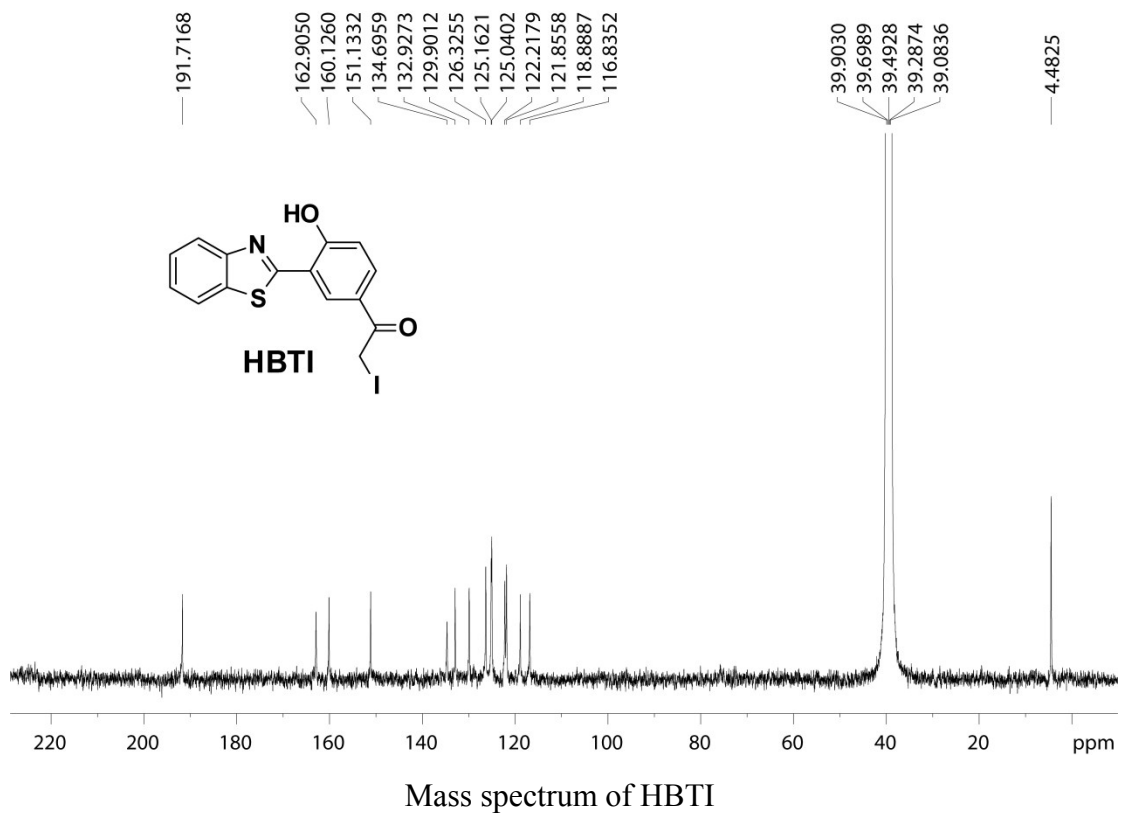

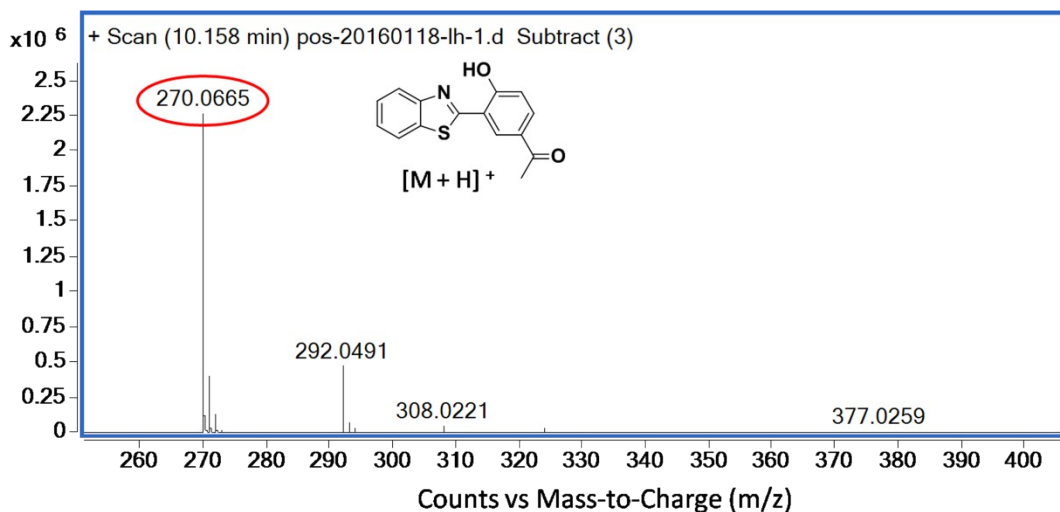

ESI-MS of HBT-Ac

|                                       |                                                     |
|---------------------------------------|-----------------------------------------------------|
| Date of acquisition                   | 2016-12-06T17:56:27.574+08:00                       |
| Acquisition method name               | D:\Methods\flexControlMethods\gc-RP_100-1500_Da.par |
| Acquisition operation mode            | Reflector                                           |
| Voltage polarity                      | POS                                                 |
| Number of shots                       | 500                                                 |
| Name of spectrum used for calibration |                                                     |
| Calibration reference list used       | sample                                              |

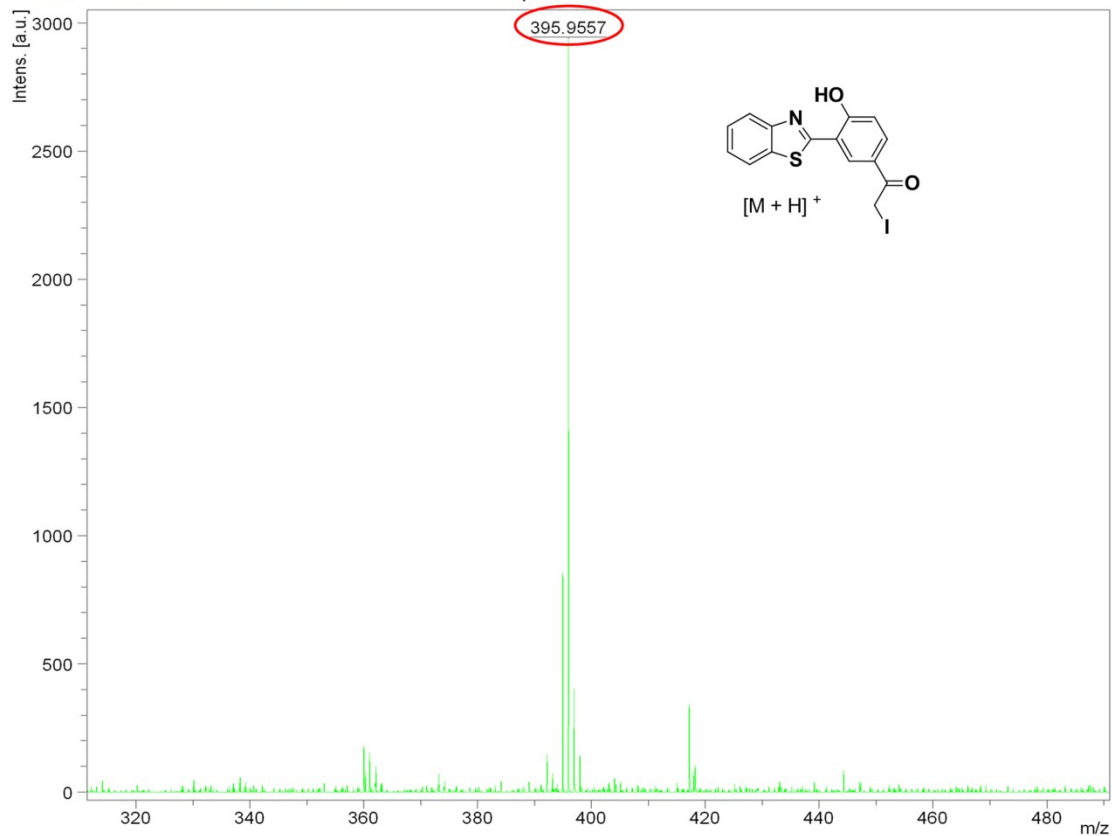

HRMS (ESI<sup>+</sup>) of HBTI

## 2. Additional experiment data

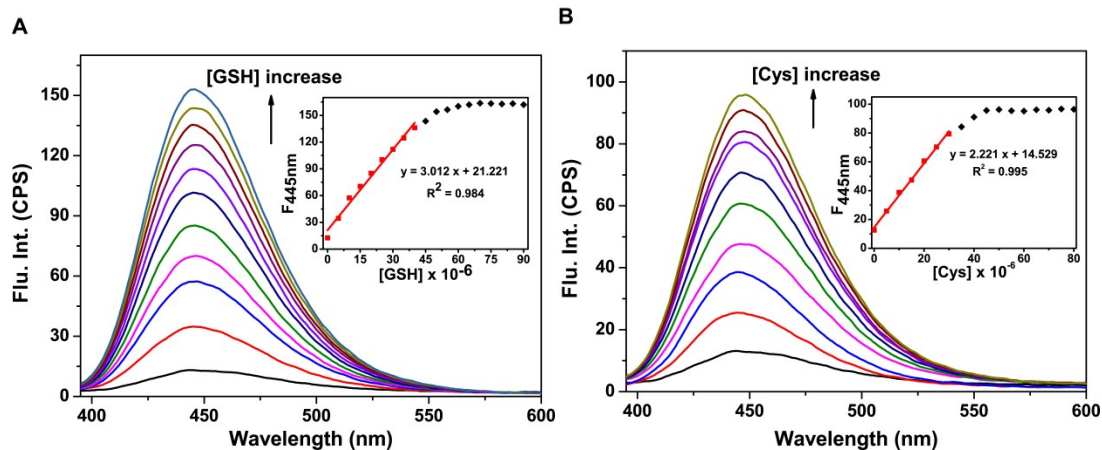

**Fig. S1.** Titration graph of the fluorescence response of probe HBTI (10  $\mu$ M) toward GSH (A) and Cys (B) in PBS buffer (10 mM, pH 7.4, containing 1%  $\text{CH}_3\text{CN}$ , v/v) at 25 $^\circ\text{C}$ . Inset: plot of the fluorescence intensity at 445 nm of probe HBTI versus GSH and Cys concentrations. Each spectrum was performed after 15 min.  $E_x = 385$  nm,  $d_{\text{ex}} = d_{\text{em}} = 3$  nm.

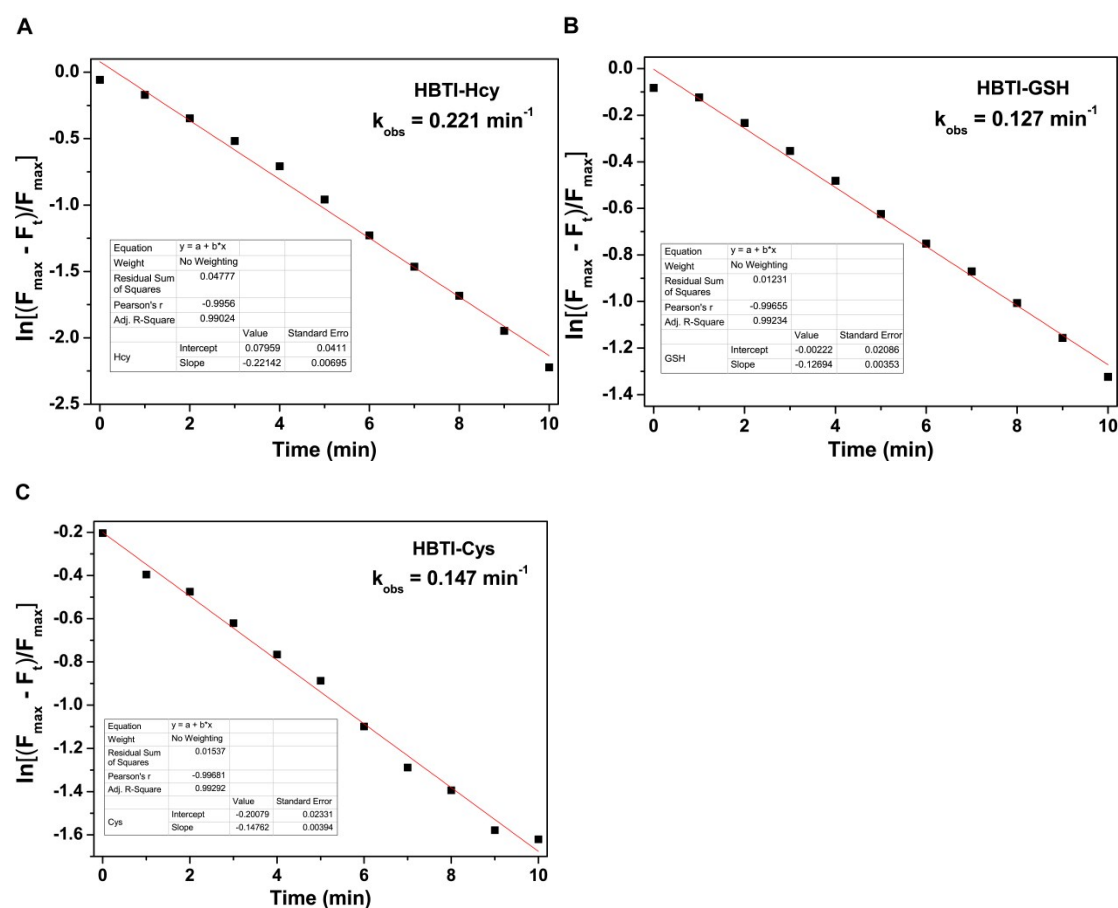

**Fig. S2.** The pseudo-first-order kinetic analysis of probe HBTI (10  $\mu$ M) to Hcy, GSH and Cys (50  $\mu$ M each) in PBS buffer (10 mM, pH 7.4, containing 1%  $\text{CH}_3\text{CN}$ , v/v) at 25 $^\circ\text{C}$ .  $E_x = 385$  nm,  $d_{\text{ex}} = d_{\text{em}} = 3$  nm.

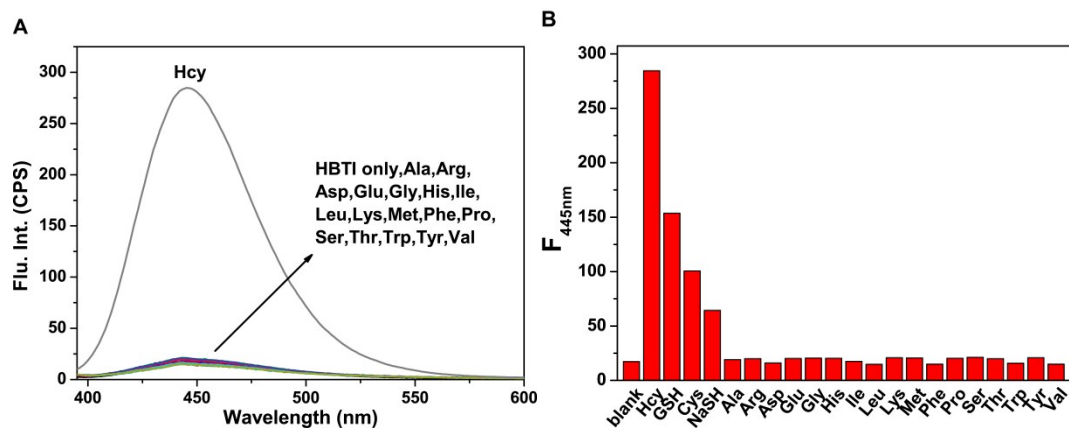

**Fig. S3.** Fluorescence spectrum (A) and bar graph (B) of probe HBTI (10  $\mu$ M) upon addition of Ala, Arg, Asp, Glu, Gly, His, Ile, Leu, Lys, Met, Phe, Pro, Ser, Thr, Trp, Tyr, Val and NaSH (various analytes: 100  $\mu$ M; Hcy: 50  $\mu$ M; GSH: 1 mM; Cys: 200  $\mu$ M) in PBS buffer (10 mM, pH 7.4, containing 1%  $\text{CH}_3\text{CN}$ , v/v) at 25°C.  $\text{Ex} = 385 \text{ nm}$ ,  $\text{d}_{\text{ex}} = \text{d}_{\text{em}} = 3 \text{ nm}$ .

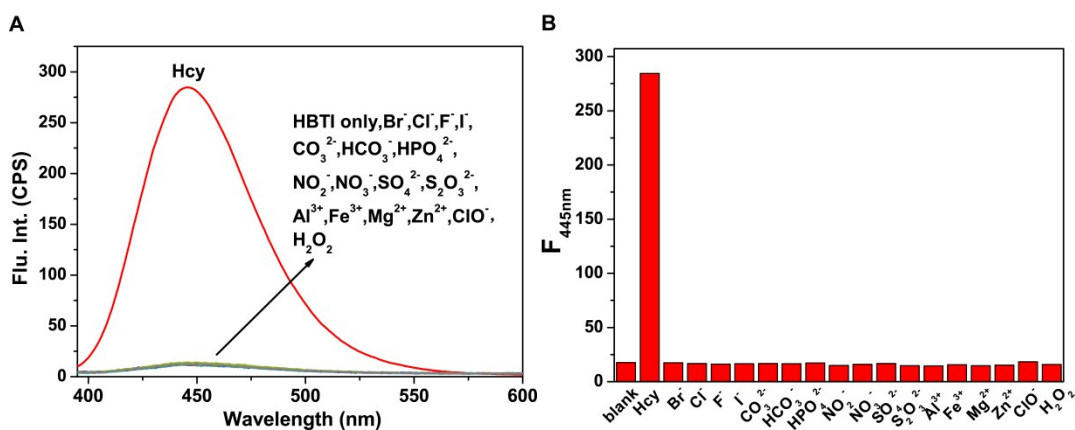

**Fig. S4.** Fluorescence spectrum (A) and bar graph (B) of probe HBTI (10  $\mu$ M) upon addition of various analytes (100  $\mu$ M) in PBS buffer (10 mM, pH 7.4, containing 1%  $\text{CH}_3\text{CN}$ , v/v) at 25°C.  $\text{Ex} = 385 \text{ nm}$ ,  $\text{d}_{\text{ex}} = \text{d}_{\text{em}} = 3 \text{ nm}$ .

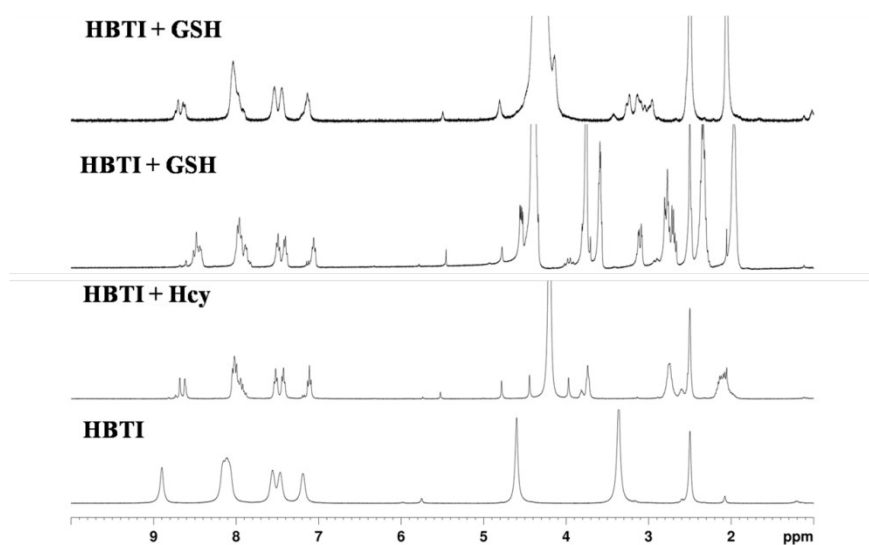

**Fig. S5.**  $^1\text{H}$  NMR spectra changes of probe HBTI in the presence of excessive Hcy, GSH and Cys in  $\text{d}_6$ -DMSO/ $\text{D}_2\text{O}$  (9:1, v/v), respectively.

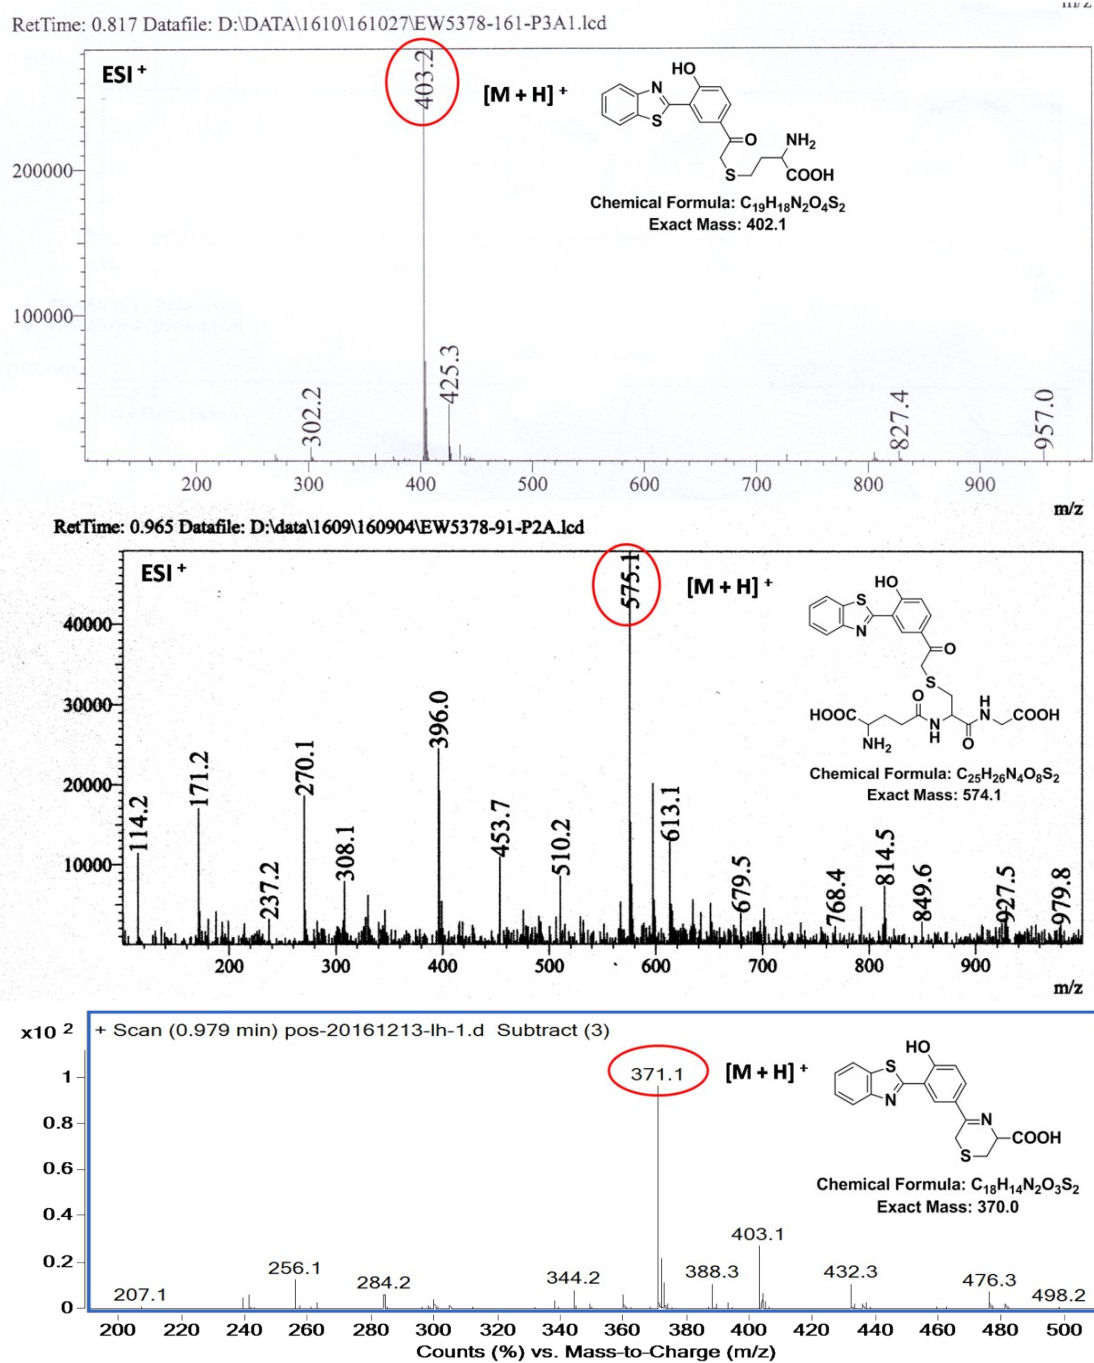

**Fig. S6.** MS (ESI<sup>+</sup>) of probe HBTI in the presence of Hcy, GSH and Cys, respectively.

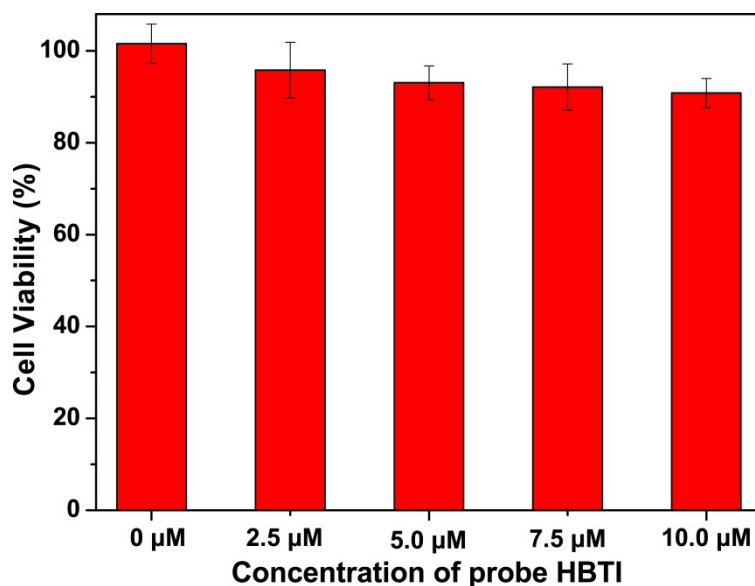

**Fig. S7.** Cell viability of HeLa cells treated with different concentrations of probe HBTI (0, 2.5, 5.0, 7.5 and 10.0 μM) for 12 h. The cell viability was observed via CCK-8 assay.

### 3. Table S1. Comparison of fluorescent probe for Hcy

| Probes                                                                              | Detection system                                     | Response time | Detection limit         | Reference                         |
|-------------------------------------------------------------------------------------|------------------------------------------------------|---------------|-------------------------|-----------------------------------|
| 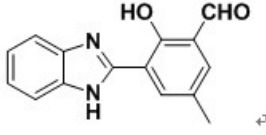 | HEPES buffer (pH 7.4) containing 10% EtOH            | 80 min        | $9.02 \times 10^{-6}$ M | Tetrahedron Lett. 2016, 57, 5227. |
|  | HEPES buffer (pH 7.0) containing 98% EtOH            | 100 min       | $5.4 \times 10^{-5}$ M  | Chem Commun., 2016,52, 827.       |
|  | PB buffer (pH 8.0) containing 20% CH <sub>3</sub> CN | 3 min         | $3.46 \times 10^{-7}$ M | J. Mater. Chem. C, 2015, 3,8397.  |
|  | HEPES buffer (pH 7.4) containing 10% DMSO            | 10 min        | $1.94 \times 10^{-6}$ M | Chem. Commun., 2014, 50, 6967.    |



|                                                                                                                                                                                                                                                                                                                                                                                                                                |                                                           |               |                                          |                                          |
|--------------------------------------------------------------------------------------------------------------------------------------------------------------------------------------------------------------------------------------------------------------------------------------------------------------------------------------------------------------------------------------------------------------------------------|-----------------------------------------------------------|---------------|------------------------------------------|------------------------------------------|
| 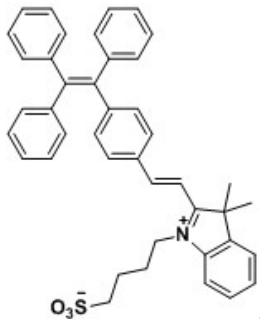 <p>The structure shows a central carbon atom double-bonded to two phenyl rings and single-bonded to a phenyl ring and a vinyl group. The vinyl group is further substituted with a nitrogen atom that is part of a cationic sulfonium group, specifically a trimethylsulfonium group with a butyl chain attached to the sulfur atom.</p>     | <p>Buffer (pH 8.0) containing 1% DMSO</p>                 | <p>5 min</p>  | <p><math>1.2 \times 10^{-5}</math> M</p> | <p>J. Mater. Chem. B, 2014, 2, 3919.</p> |
|  <p>The structure features a benzothiazole ring system. The nitrogen atom of the thiazole ring is double-bonded to a carbon atom, which is also double-bonded to a phenyl ring. This phenyl ring has a hydroxyl group (-OH) at the 4-position and a propyl iodide group (-CH<sub>2</sub>CH<sub>2</sub>CH<sub>2</sub>I) at the 2-position.</p> | <p>PBS buffer (pH 7.4) containing 1% CH<sub>3</sub>CN</p> | <p>15 min</p> | <p><math>1.6 \times 10^{-7}</math> M</p> | <p>This work</p>                         |
